# Is *FTO* gene variant related to cancer risk independently of adiposity? An updated meta-analysis of 129,467 cases and 290,633 controls

Yu Kang<sup>2</sup>, Fang Liu<sup>1</sup> and Yao Liu<sup>1</sup>

<sup>1</sup>Department of Pharmacy, Southwest Hospital, Third Military Medical University, Chongqing, 400038, China

<sup>2</sup>Department of Oncology, Southwest Hospital, Third Military Medical University, Chongqing, 400038, China

Correspondence to: Yao Liu, email: swhliuyao@163.com

Keywords: *FTO*, meta-analysis, cancer, obesity

Received: December 28, 2016

Accepted: February 28, 2017

Published: March 22, 2017

Copyright: Kang et al. This is an open-access article distributed under the terms of the Creative Commons Attribution License 3.0 (CC BY 3.0), which permits unrestricted use, distribution, and reproduction in any medium, provided the original author and source are credited.

## ABSTRACT

Previous studies have examined the association between the fat mass and obesity-associated (*FTO*) gene variant and risk of cancer in diverse populations. However, the results have been inconsistent. PubMed and Embase databases were searched for the eligible publications in English language by July, 2016. The associations of *FTO* variants with cancer risk were estimated by calculating the pooled odds ratios and 95% confidence intervals by meta-analyses. A total of 27 publications (129,467 cancer cases and 290,633 normal controls) were included in our meta-analysis. Overall, *FTO* rs9939609 variant (or its proxy) was not associated with cancer risk without adjustment for body mass index, as well as additional adjustment for body mass index. However, *FTO* rs9939609 variant was associated with some types of cancer in the subgroup analysis. In addition, overall, there was no significant association between *FTO* rs1477196 variant and cancer risk regardless of adjustment for body mass index. However, *FTO* rs11075995 variant risk allele was associated with breast cancer risk without adjustment for body mass index, but the association disappeared with further adjustment for body mass index. This study overall does not support that the *FTO* variant is associated with cancer risk independently of the adiposity.

## INTRODUCTION

In 2007, the fat mass and obesity associated (*FTO*) gene was reported as the first obesity related gene by the genome-wide association studies (GWAS) in Caucasian population [1, 2]. Subsequently, the following studies confirmed the positive associations between single nucleotide polymorphisms (SNPs) in/near *FTO* gene and obesity risk in diverse populations [3–5].

*FTO* gene was found to affect the function of the central nervous system, as well as adipose tissue at a peripheral level. As obesity is a well established risk factor for most types of cancer, it is interesting and important to investigate whether *FTO* SNPs are associated with risk of cancer. Up to now, a total of 27 publications have examined the associations between *FTO* SNPs and risk of cancer [6–32]. However, the results have been inconsistent. Three meta-analyses have summarized the associations between

*FTO* SNPs and risk of cancer [33–35]; however, there are several limitations for them. First, they did not address whether the associations were mediated through body mass index (BMI)/obesity. Second, many eligible studies were omitted. Third, two of three from the same study team examined the association between each of two SNPs (rs8050136[34] and rs9939609[35]) in/near *FTO* gene and cancer risk. It is illogical to do the separate analyses for these two SNPs as they are in strong linkage disequilibrium (LD,  $r^2 > 0.90$ ) in both European and Asian populations.

Therefore, we aimed to perform an updated meta-analysis to investigate the associations between *FTO* rs9939609 SNP (or any proxy SNP,  $r^2 > 0.90$ ) and other SNPs which are not in tight LD with rs9939609 SNP (such as rs1477196 and rs11075995) and cancer risk. In addition, we also aimed to examine whether the associations are independent of adiposity.

## RESULTS

### Characteristics of the studies

A flow chart describing the process of inclusion/exclusion of studies is presented in Figure 1. The literature search identified a total of 238 potentially relevant articles. At last, a total of 27 publications (129,467 cancer cases and 290,633 normal controls) were included in our meta-analysis. There were 24 publications (113780 cases and 210593 controls) for *FTO* rs9939609 SNP, 5 publications (1594 cases and 2034 controls) for *FTO* rs1477196 SNP, and 3 publications (14144 cases and 79973 controls) for rs11075995 variant. All three SNPs in the each of included studies were in Hardy-Weinberg Equivalent. The characteristics of the included studies are listed in Table 1.

### Meta-analysis results

Overall, *FTO* rs9939609 SNP was not associated with cancer risk without adjustment for BMI (OR=1.01, 95%CI=0.97-1.05). In the subgroup analysis by race/ethnicity, before adjustment for BMI, there was no any significant associations in European population, East Asian population, Middle East population and mixed population (all  $P>0.05$ ) (Figure 2). After adjustment for BMI, *FTO* rs9939609 SNP risk allele was associated with cancer risk

in East Asian population (OR=1.29, 95%CI=1.06-1.57) and African population (OR=1.21, 95%CI=1.06-1.38), but not in European population, Middle East population and Mixed population (all  $P>0.05$ ) (Figure 3). In the subgroup analysis by cancer type, *FTO* rs9939609 SNP risk allele marginally increased risk of endometrial cancer (OR=1.07, 95%CI=1.00-1.14) and pancreatic cancer (OR=1.12, 95%CI=1.04-1.21), while it marginally decreased risk of breast cancer (OR=0.94, 95%CI=0.92-0.96) (Table 2 and Supplementary Figure 1). Overall, there was also no significant association between *FTO* rs9939609 SNP and cancer risk with adjustment for BMI (OR=1.01, 95%CI=0.93-1.10). *FTO* rs9939609 SNP risk allele marginally decreased risk of prostate cancer (OR=0.93, 95%CI=0.88-0.99), while it marginally increased risk of breast cancer (OR=1.12, 95%CI=0.99-1.26) (Table 2 and Supplementary Figure 2).

There was no significant association between *FTO* rs1477196 SNP and cancer risk without (OR=1.07, 95%CI=0.97-1.20) or with (OR=1.08, 95%CI=0.97-1.21) adjustment for BMI. However, we found a significant association between *FTO* rs1477196 SNP and risk of thyroid cancer without (OR=1.31, 95%CI=1.07-1.61) or with (OR=1.32, 95%CI=1.08-1.62) adjustment for BMI (Table 2 and Supplementary Figures 3-4).

*FTO* rs11075995 SNP risk allele was associated with breast cancer risk without adjustment for BMI (OR=1.08,

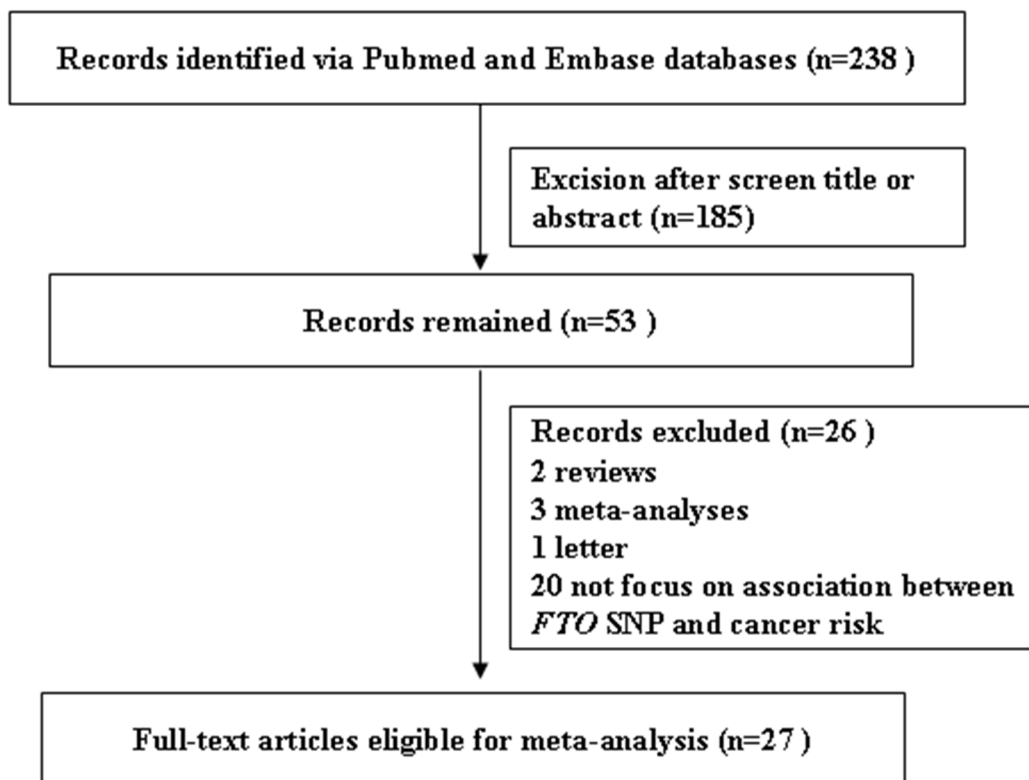

Figure 1: Flowchart for inclusion/exclusion of studies.

**Table 1: The detailed characteristics of the included studies in the meta-analysis**

| Study *              | Country                                                                                 | Ethnicity  | Type of cancer             | No. of cases | No. of controls | OR    | 95% CI |      |            | SNP | Adjustment for BMI |
|----------------------|-----------------------------------------------------------------------------------------|------------|----------------------------|--------------|-----------------|-------|--------|------|------------|-----|--------------------|
| Brennan, 2009 [6]    | Czech Republic, Hungary, Poland, Romania, Russia, and Slovakia                          | European   | Lung cancer                | 2250         | 3052            | 0.92  | 0.84   | 1.00 | rs9939609  | No  |                    |
| Brennan, 2009 [6]    | Czech Republic, Hungary, Poland, Romania, Russia, and Slovakia                          | European   | Kidney cancer              | 954          | 3052            | 1.06  | 0.95   | 1.19 | rs9939609  | No  |                    |
| Brennan, 2009 [6]    | Czech Republic, Hungary, Poland, Romania, Russia, and Slovakia                          | European   | Upper aerodigestive cancer | 811          | 3052            | 0.98  | 0.87   | 1.12 | rs9939609  | No  |                    |
| Gaudet, 2010 [7]     | USA and Australia                                                                       | Mixed      | Endometrial cancer         | 417          | 406             | 1.05  | 0.86   | 1.28 | rs8050136  | No  |                    |
| Lewis, 2010 [8]      | UK                                                                                      | European   | Prostate cancer            | 1550         | 1815            | 0.94  | 0.85   | 1.03 | rs9939609  | Yes |                    |
| Meyer, 2010 [9]      | USA                                                                                     | Mixed      | Prostate cancer            | 379          | 5874            | 1.04  | 0.91   | 1.20 | rs8050136  | No  |                    |
| Delahanty, 2011 [10] | China                                                                                   | East Asian | Endometrial cancer         | 832          | 2049            | 1.07  | 0.89   | 1.29 | rs9939609  | No  |                    |
| Kaklamani, 2011 [11] | USA                                                                                     | Mixed      | Breast cancer              | 302          | 349             | 0.992 | 0.78   | 1.26 | rs9939609  | No  |                    |
|                      |                                                                                         |            |                            |              |                 | 0.975 | 0.77   | 1.23 |            | Yes |                    |
|                      |                                                                                         |            |                            |              |                 | 1.408 | 1.11   | 1.79 | rs1477196  | No  |                    |
|                      |                                                                                         |            |                            |              |                 | 1.447 | 1.13   | 1.85 |            | Yes |                    |
| Lurie, 2011 [12]     | Australia, USA, Poland, and Canada                                                      | European   | Endometrial cancer         | 3561         | 5167            | 1.07  | 0.99   | 1.14 | rs9939609  | No  |                    |
|                      |                                                                                         |            |                            |              |                 | 1.01  | 0.94   | 1.08 |            | Yes |                    |
| Pierce, 2011 [13]    | Finland, USA, China, France, Germany, Greece, Italy, The Netherlands, Spain, and the UK | European   | Pancreatic cancer          | 1763         | 1802            | 1.12  | 1.02   | 1.23 | rs8050136  | No  |                    |
| Tang, 2011 [14]      | USA                                                                                     | Mixed      | Pancreatic cancer          | 1053         | 1130            | 1.08  | 0.96   | 1.22 | rs9939609  | No  |                    |
|                      |                                                                                         |            |                            |              |                 | 1.03  | 0.80   | 1.30 |            | Yes |                    |
| Brooks, 2012 [15]    | USA and Denmark                                                                         | European   | Breast cancer              | 643          | 1271            | 1.1   | 0.9    | 1.3  | rs9939609  | No  |                    |
| Hubacek, 2012 [16]   | Czech Republic, Hungary, Poland, Romania, Russia, and Slovakia                          | European   | Colorectal cancer          | 1005         | 6827            | 1.02  | 0.93   | 1.13 | rs17817449 | No  |                    |
| Kitahara, 2012 [17]  | USA                                                                                     | European   | Thyroid cancer             | 341          | 444             | 0.77  | 0.62   | 0.94 | rs9939609  | No  |                    |
|                      |                                                                                         |            |                            |              |                 | 0.76  | 0.61   | 0.93 |            | Yes |                    |
|                      |                                                                                         |            |                            |              |                 | 1.31  | 1.07   | 1.61 | s1477196   | No  |                    |

(Continued)

| Study *                  | Country                            | Ethnicity   | Type of cancer    | No. of cases | No. of controls | OR    | 95% CI      | SNP        | Adjustment for BMI |
|--------------------------|------------------------------------|-------------|-------------------|--------------|-----------------|-------|-------------|------------|--------------------|
|                          |                                    |             |                   |              |                 | 1.32  | 1.07 1.61   |            | Yes                |
| Kusinska, 2012 [18]      | Poland                             | European    | Breast cancer     | 134          | 357             | 1.05  | 0.68 1.61   | rs9939609  | No                 |
| Lim, 2012 [19]           | USA                                | Mixed       | Colorectal cancer | 2033         | 9640            | 1.02  | 0.93 1.11   | rs9939609  | No                 |
| Machiela, 2012 [20]      | USA and several European countries | European    | Prostate cancer   | 2782         | 4458            | 0.93  | 0.86 1.00   | rs9939609  | Yes                |
| Tarabra, 2012 [21]       | Italy                              | European    | Colorectal cancer | 341          | 311             | 1.01  | 0.81 1.25   | rs9939609  | No                 |
| Akilzhanova, 2013 [22]   | Kazakhstan                         | European    | Breast cancer     | 315          | 604             | 0.96  | 0.78 1.17   | rs1477196  | No                 |
|                          |                                    |             |                   |              |                 | 0.96  | 0.78 1.17   |            | Yes                |
| da Cunha, 2013 [23]      | Brazil                             | European    | Breast cancer     | 100          | 148             | 0.86  | 0.60 1.25   | rs9939609  | No                 |
|                          |                                    |             |                   |              |                 | 0.87  | 0.61 1.26   |            | Yes                |
| Garcia-Closas, 2013 [24] | USA and many European countries    | European    | Breast cancer     | 10706        | 76647           | 1.11  | 1.07 1.15   | rs11075995 | No                 |
|                          |                                    |             |                   | 3071         | 20130           | 1.16  | 1.09 1.24   |            | Yes                |
| Iles, 2013 [25]          | European countries                 | European    | Melanoma          | 13060        | 60726           | 1.03  | 0.97 1.10   | rs8050136  | No                 |
| Lin, 2013 [26]           | Japan                              | East Asian  | Pancreatic cancer | 360          | 400             | 1.33  | 1.04 1.72   | rs9939609  | No                 |
|                          |                                    |             |                   |              |                 | 1.41  | 1.07 1.85   |            | Yes                |
| Long, 2013 [27]          | USA                                | African     | Breast cancer     | 1113         | 930             | 1.21  | 1.06 1.37   | rs17817449 | Yes                |
| Zheng, 2013 [28]         | China, Korea, Japan and Thailand   | East Asian  | Breast cancer     | 16797        | 18983           | 0.92  | 0.88 0.97   | rs17817449 | No                 |
| Zhang, 2014 [29]         | China                              | East Asian  | Breast cancer     | 2901         | 2789            | 1.06  | 0.98 1.14   | rs11075995 | No                 |
| Mojaver, 2015 [30]       | Iran                               | Middle East | Breast cancer     | 99           | 100             | 0.85  | 0.51 1.41   | rs9939609  | No                 |
|                          |                                    |             |                   |              |                 | 1.215 | 0.683 2.161 |            | Yes                |
|                          |                                    |             |                   |              |                 | 1.14  | 0.64 2.01   | rs1477196  | No                 |
|                          |                                    |             |                   |              |                 | 0.890 | 0.464 1.707 |            | Yes                |
| Zeng, 2015 [31]          | China                              | East Asian  | Breast cancer     | 537          | 537             | 1.19  | 0.90 1.57   | rs9939609  | No                 |
|                          |                                    |             |                   |              |                 | 1.18  | 0.89 1.56   |            | Yes                |
|                          |                                    |             |                   |              |                 | 0.73  | 0.58 0.93   | rs1477196  | No                 |
|                          |                                    |             |                   |              |                 | 0.75  | 0.59 0.96   |            | Yes                |
|                          |                                    |             |                   |              |                 | 0.90  | 0.71 1.15   | rs11075995 | No                 |
|                          |                                    |             |                   |              |                 | 0.94  | 0.73 1.20   |            | Yes                |
| Zhao, 2016 [32]          | Several European countries         | European    | Breast cancer     | 62328        | 83817           | 0.94  | 0.92 0.95   | rs9939609  | No                 |

\* All included studies were case-control designed.

95%CI=1.01-1.15) (Table 2 and Supplementary Figure 5). However, the significant association disappeared after adjustment for BMI (OR=1.08, 95%CI=0.89-1.31) (Table 2 and Supplementary Figure 6).

### Publication bias

There was no publication bias for *FTO* rs9939609, rs1477196 or rs11075995 SNP using Begg's test or Egger's test (all  $P > 0.05$ ).

## DISCUSSION

Our updated meta-analysis shows that *FTO* rs9939609 SNP was associated with some types of cancer, such as endometrial cancer, pancreatic cancer and breast cancer without adjustment for BMI, while it was still associated with breast cancer and prostate cancer with adjustment for BMI. In addition, *FTO* rs1477196 SNP was associated with thyroid cancer independently of BMI and *FTO* rs11075995 SNP was associated with breast cancer dependently on BMI.

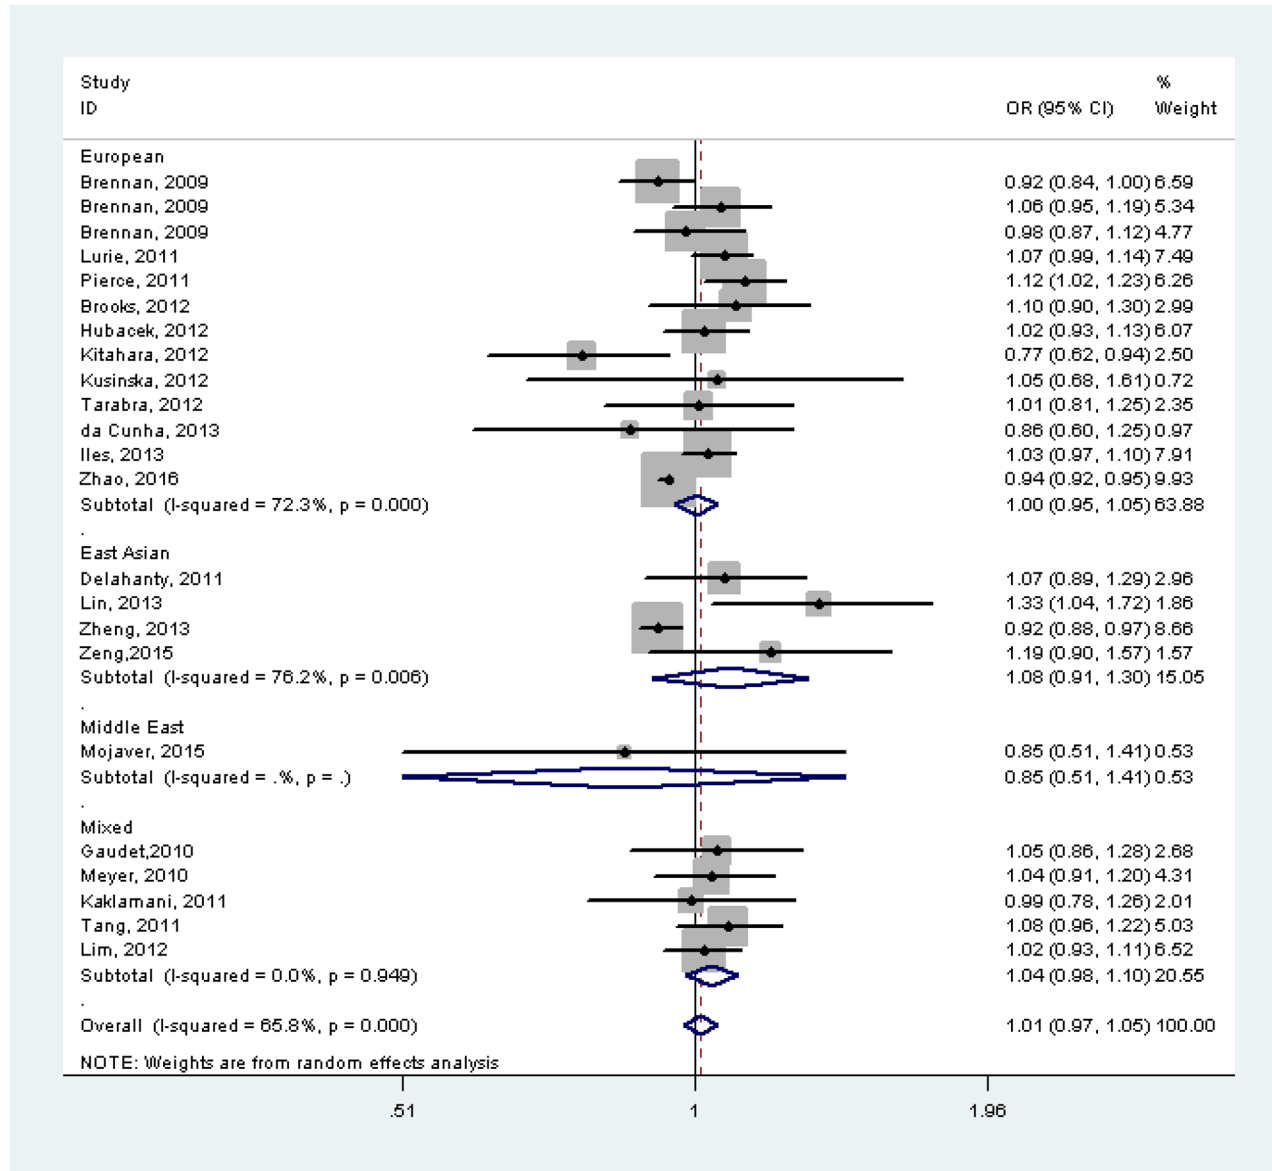

Figure 2: Forest plot of the effect of *FTO* rs9939609 on risk of cancer by race/ethnicity without adjustment for body mass index.

Several meta-analyses have addressed the association between *FTO* SNP and risk of diabetes, [36] hypertension, [37] cardiovascular disease, [38] polycystic ovary syndrome [39] and mortality [40]. Most of these meta-analyses supported *FTO* SNP was associated with health outcomes independently of adiposity. A meta-analysis of data from 169,551 Caucasian adults showed that the hazards ratio (HR) for the A minor allele of the *FTO* rs9939609 SNP was 1.02 (1.00–1.04,  $P=0.097$ ), but the association disappeared after adjustment for BMI (HR=1.00; 0.98–1.03,  $P=0.662$ ) [40]. These results suggested that *FTO* SNP risk allele increases risk of mortality directly through adiposity pathway.

It seemed that *FTO* rs9939609 SNP played different roles in the development of different cancer, as well as in different populations. Previous studies demonstrated that BMI was associated with risk of common cancer, but

its association with some cancer types differed between sexes and different ethnic populations [41]. As *FTO* SNP rs9939609 was strongly associated with BMI, it is not surprising that this variant was associated with some types of cancer but not with other types of cancer.

The *FTO* protein is highly expressed in hypothalamus, as well as in many other tissues: mesenteric fat, adipose, pancreatic, and liver. It regulates the global metabolic rate, energy expenditure, energy homeostasis, body size and body fat accumulation [42]. *FTO* rs8050136 was reported to preferentially bind to cut-like homeobox (*CUTL1*) in human fibroblast DNA and silencing this transcriptional factor *CUTL1* could lead to decreased *FTO* expression in fibroblasts [43]. In addition, *FTO* SNP was strongly associated with expression of a tumor suppressor/cell cycle-

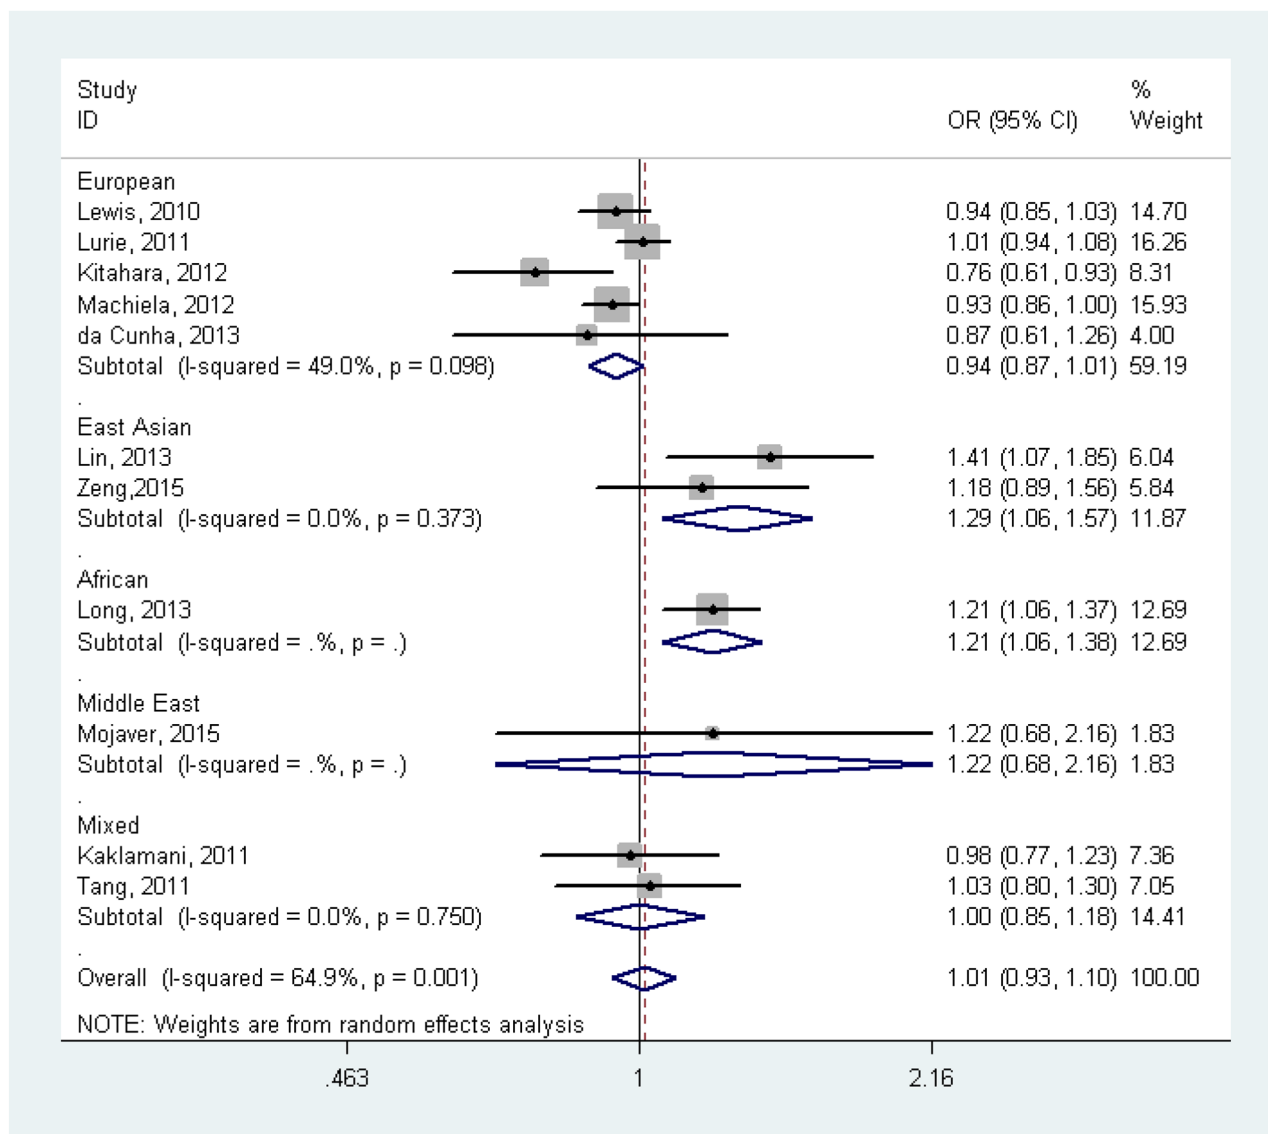

**Figure 3: Forest plot of the effect of *FTO* rs9939609 on risk of cancer by race/ethnicity with adjustment for body mass index.**

**Table 2: Associations between *FTO* variants and cancer risk by cancer type**

|                       | OR   | 95% CI    | I <sup>2</sup> (%) | P<br>for heterogeneity |
|-----------------------|------|-----------|--------------------|------------------------|
| <b>rs9939609</b>      |      |           |                    |                        |
| Before BMI adjustment |      |           |                    |                        |
| All                   | 1.01 | 0.97-1.05 | 65.8               | <0.001                 |
| Endometrial cancer    | 1.07 | 1.00-1.14 | 0                  | 0.985                  |
| Breast cancer         | 0.94 | 0.92-0.96 | 1.8                | 0.416                  |
| Pancreatic cancer     | 1.12 | 1.04-1.21 | 6.8                | 0.342                  |
| Colorectal cancer     | 1.02 | 0.96-1.09 | 0                  | 0.996                  |
| Others                | 0.98 | 0.92-1.05 | 57.4               | 0.038                  |
| After BMI adjustment  |      |           |                    |                        |
| All                   | 1.01 | 0.93-1.10 | 64.9               | 0.001                  |
| Breast cancer         | 1.12 | 0.99-1.26 | 14.2               | 0.324                  |
| Pancreatic cancer     | 1.20 | 0.88-1.63 | 64.7               | 0.093                  |
| Prostate cancer       | 0.93 | 0.88-0.99 | 0                  | 0.864                  |
| Others                | 0.89 | 0.68-1.18 | 84.1               | 0.012                  |
| <b>rs1477196</b>      |      |           |                    |                        |
| Before BMI adjustment |      |           |                    |                        |
| All                   | 1.07 | 0.97-1.20 | 80.1               | <0.001                 |
| Breast cancer         | 1.00 | 0.88-1.13 | 80.2               | 0.002                  |
| Thyroid cancer        | 1.31 | 1.07-1.61 | -                  | -                      |
| After BMI adjustment  |      |           |                    |                        |
| All                   | 1.08 | 0.97-1.21 | 79.4               | 0.001                  |
| Breast cancer         | 1.00 | 0.88-1.14 | 79.1               | 0.002                  |
| Thyroid cancer        | 1.32 | 1.08-1.62 | -                  | -                      |
| <b>rs11075995</b>     |      |           |                    |                        |
| Before BMI adjustment |      |           |                    |                        |
| Breast cancer         | 1.08 | 1.01-1.15 | 47.2               | 0.150                  |
| After BMI adjustment  |      |           |                    |                        |
| Breast cancer         | 1.08 | 0.89-1.31 | 61.2               | 0.108                  |

repressing gene, namely retinoblastoma-like 2 [44]. Further studies are necessary to clarify the underlying mechanism between *FTO* SNP and cancer risk.

Our study has several strengths. First, our study included 27 publications consisting of ~130, 000 cases

and ~300,000 controls, which had the larger statistical power than three previous meta-analyses [33–35]. Second, we presented results without and with adjustment for BMI, but the previous three meta-analyses didn't. Third, besides rs9939609 and its proxy SNP (rs8050136



and rs17817449), we also investigated two other SNPs (rs1477196 or rs11075995), which are not in high LD with rs9939609. However, several limitations should be noted. First, the effects of gene-gene/gene-environment interactions were not addressed in this meta-analysis as the included individual studies did not provide us with these data. Second, although the total sample size was large enough, it was still limited for some types of cancer. Thus, the subgroup results with limited statistical power should be interpreted with caution. Third, there was significant heterogeneity between studies for three SNPs and the results should be interpreted cautiously.

In conclusion, our updated meta-analysis supported that *FTO* SNP was associated with some types of cancer, which was mediated by BMI or independent of BMI. Further studies should focus on gene-gene/gene-environment interaction in the development of cancer. Epigenetics and metabolomics should be paid more attention in order to solve how BMI modify the association between *FTO* SNP and cancer risk.

## MATERIALS AND METHODS

### Literature and search strategy

We searched PubMed and Embase databases for the potentially eligible studies. The following key words were used to search the eligible publications: (fat-mass and obesity-associated gene OR *FTO*) and (polymorphism OR variant OR variation OR genotype) and (cancer OR tumor OR carcinoma). We restricted publication language to English. The reference lists of retrieved articles were also hand-searched. The literature search was updated by July 14, 2016.

### Inclusion criteria and data extraction

The included studies met all the following inclusion criteria: (1) investigation of the association of *FTO* rs9939609 SNP (or any proxy SNP (rs8050136, rs17817449),  $r^2 > 0.90$ ) or other SNPs which are not in tight LD with rs9939609 (such as rs1477196 and rs11075995) with cancer risk; (2) use of a case-control or cohort design; and (3) provision of an odds ratio (OR) with 95% confidence interval (CI) with or without adjustment for body mass index (BMI). The following information was extracted from each study: (1) name of the first author; (2) year of publication; (3) country of origin; (4) race/ethnicity of the study population; (5) number of cases and controls; (6) type of cancer; (7) studied SNP; and (8) whether adjusted for BMI in the logistical regression model. Two authors independently reviewed the articles for compliance with the inclusion/exclusion criteria, resolved disagreements and reached a consistent decision after discussion with the third author.

## Statistical analysis

The associations of *FTO* SNPs with cancer risk were estimated by calculating the pooled ORs and 95% CIs under an additive genetic model. The significance of the OR was determined by the Z test ( $p < 0.05$  was considered statistically significant). Cochran's Q test was performed to test the between-study heterogeneity [45, 46].  $I^2$  represents the range for degree of heterogeneity. A random-effects (DerSimonian-Laird [45]) or fixed-effects (Mantel-Haenszel [46]) model was used to calculate the pooled OR in the presence ( $p \leq 0.10$  or  $I^2 \geq 50\%$ ) or absence ( $p > 0.10$  and  $I^2 < 50\%$ ) of heterogeneity, respectively. Publication bias was assessed by Begg's test and Egger's test [47] ( $p < 0.05$  was considered statistically significant). Data were analyzed using STATA version 11.0 (StataCorp LP, College Station, TX, USA).

## Author contributions

Y.L. conceived, designed and supervised the study. Y.K. wrote the manuscript. Y.K. and F.L. searched the databases, extracted and analyzed the data. All authors reviewed and approved the final manuscript.

## CONFLICTS OF INTEREST

The authors declare no conflicts of interest.

## REFERENCES

1. Frayling TM, Timpson NJ, Weedon MN, Zeggini E, Freathy RM, Lindgren CM, Perry JR, Elliott KS, Lango H, Rayner NW, Shields B, Harries LW, Barrett JC, et al. A common variant in the *FTO* gene is associated with body mass index and predisposes to childhood and adult obesity. *Science*. 2007; 316:889-94. doi: 10.1126/science.1141634.
2. Dina C, Meyre D, Gallina S, Durand E, Korner A, Jacobson P, Carlsson LM, Kiess W, Vatin V, Lecoecur C, Delplanque J, Vaillant E, Pattou F, et al. Variation in *FTO* contributes to childhood obesity and severe adult obesity. *Nat Genet*. 2007; 39:724-6. doi: 10.1038/ng2048.
3. Xi B, Mi J. *FTO* polymorphisms are associated with obesity but not with diabetes in East Asian populations: a meta-analysis. *Biomed Environ Sci*. 2009; 22:449-57. doi: 10.1016/S0895-3988(10)60001-3.
4. Xi B, Wang C, Wang R, Huang Y. *FTO* gene polymorphisms are associated with obesity and type 2 diabetes in East Asian populations: an update. *Obesity (Silver Spring)*. 2011; 19:236-7; author reply 8. doi: 10.1038/oby.2010.139.
5. Liu C, Mou S, Cai Y. *FTO* gene variant and risk of overweight and obesity among children and adolescents: a systematic review and meta-analysis. *PLoS One*. 2013; 8:e82133. doi: 10.1371/journal.pone.0082133.



6. Brennan P, McKay J, Moore L, Zaridze D, Mukeria A, Szeszenia-Dabrowska N, Lissowska J, Rudnai P, Fabianova E, Mates D, Bencko V, Foretova L, Janout V, et al. Obesity and cancer: Mendelian randomization approach utilizing the FTO genotype. *Int J Epidemiol*. 2009; 38:971-5. doi: 10.1093/ije/dyp162.
7. Gaudet MM, Yang HP, Bosquet JG, Healey CS, Ahmed S, Dunning AM, Easton DF, Spurdle AB, Ferguson K, O'Mara T, Lambrechts D, Despierre E, Vergote I, et al. No association between FTO or HHEX and endometrial cancer risk. *Cancer Epidemiol Biomarkers Prev*. 2010; 19:2106-9. doi: 10.1158/1055-9965.EPI-10-0515.
8. Lewis SJ, Murad A, Chen L, Davey Smith G, Donovan J, Palmer T, Hamdy F, Neal D, Lane JA, Davis M, Cox A, Martin RM. Associations between an obesity related genetic variant (FTO rs9939609) and prostate cancer risk. *PLoS One*. 2010; 5:e13485. doi: 10.1371/journal.pone.0013485.
9. Meyer TE, Boerwinkle E, Morrison AC, Volcik KA, Sanderson M, Coker AL, Pankow JS, Folsom AR. Diabetes genes and prostate cancer in the Atherosclerosis Risk in Communities study. *Cancer Epidemiol Biomarkers Prev*. 2010; 19:558-65. doi: 10.1158/1055-9965.EPI-09-0902.
10. Delahanty RJ, Beeghly-Fadiel A, Xiang YB, Long J, Cai Q, Wen W, Xu WH, Cai H, He J, Gao YT, Zheng W, Shu XO. Association of obesity-related genetic variants with endometrial cancer risk: a report from the Shanghai Endometrial Cancer Genetics Study. *Am J Epidemiol*. 2011; 174:1115-26. doi: 10.1093/aje/kwr233.
11. Kaklamani V, Yi N, Sadim M, Siziopikou K, Zhang K, Xu Y, Tofilon S, Agarwal S, Pasche B, Mantzoros C. The role of the fat mass and obesity associated gene (FTO) in breast cancer risk. *BMC Med Genet*. 2011; 12:52. doi: 10.1186/1471-2350-12-52.
12. Lurie G, Gaudet MM, Spurdle AB, Carney ME, Wilkens LR, Yang HP, Weiss NS, Webb PM, Thompson PJ, Terada K, Setiawan VW, Rebbeck TR, Prescott J, et al. The obesity-associated polymorphisms FTO rs9939609 and MC4R rs17782313 and endometrial cancer risk in non-Hispanic white women. *PLoS One*. 2011; 6:e16756. doi: 10.1371/journal.pone.0016756.
13. Pierce BL, Austin MA, Ahsan H. Association study of type 2 diabetes genetic susceptibility variants and risk of pancreatic cancer: an analysis of PanScan-I data. *Cancer Causes Control*. 2011; 22:877-83. doi: 10.1007/s10552-011-9760-5.
14. Tang H, Dong X, Hassan M, Abbruzzese JL, Li D. Body mass index and obesity- and diabetes-associated genotypes and risk for pancreatic cancer. *Cancer Epidemiol Biomarkers Prev*. 2011; 20:779-92. doi: 10.1158/1055-9965.EPI-10-0845.
15. Brooks JD, Bernstein L, Teraoka SN, Knight JA, Mellemeckjaer L, John EM, Malone KE, Reiner AS, Lynch CF, Concannon P, Haile RW, Bernstein JL, Group WSC. Variation in genes related to obesity, weight, and weight change and risk of contralateral breast cancer in the WECARE Study population. *Cancer Epidemiol Biomarkers Prev*. 2012; 21:2261-7. doi: 10.1158/1055-9965.EPI-12-1036.
16. Hubacek JA, Dlouha D, Bobak M, Jiraskova A, Vitek L. The risk of sporadic colorectal cancer development is not influenced by fat mass and obesity related gene polymorphism in Slavs. *Eur J Intern Med*. 2012; 23:e175-6. doi: 10.1016/j.ejim.2012.07.002.
17. Kitahara CM, Neta G, Pfeiffer RM, Kwon D, Xu L, Freedman ND, Hutchinson AA, Chanock SJ, Sturgis EM, Sigurdson AJ, Brenner AV. Common obesity-related genetic variants and papillary thyroid cancer risk. *Cancer Epidemiol Biomarkers Prev*. 2012; 21:2268-71. doi: 10.1158/1055-9965.EPI-12-0790.
18. Kusinska R, Gorniak P, Pastorczak A, Fendler W, Potemski P, Mlynarski W, Kordek R. Influence of genomic variation in FTO at 16q12.2, MC4R at 18q22 and NRXN3 at 14q31 genes on breast cancer risk. *Mol Biol Rep*. 2012; 39:2915-9. doi: 10.1007/s11033-011-1053-2.
19. Lim U, Wilkens LR, Monroe KR, Caberto C, Tiirikainen M, Cheng I, Park SL, Stram DO, Henderson BE, Kolonel LN, Haiman CA, Le Marchand L. Susceptibility variants for obesity and colorectal cancer risk: the multiethnic cohort and PAGE studies. *Int J Cancer*. 2012; 131:E1038-43. doi: 10.1002/ijc.27592.
20. Machiela MJ, Lindstrom S, Allen NE, Haiman CA, Albanes D, Barricarte A, Berndt SI, Bueno-de-Mesquita HB, Chanock S, Gaziano JM, Gapstur SM, Giovannucci E, Henderson BE, et al. Association of type 2 diabetes susceptibility variants with advanced prostate cancer risk in the Breast and Prostate Cancer Cohort Consortium. *Am J Epidemiol*. 2012; 176:1121-9. doi: 10.1093/aje/kws191.
21. Tarabra E, Actis GC, Fadda M, De Paolis P, Comandone A, Coda R, Rosina F. The obesity gene and colorectal cancer risk: a population study in Northern Italy. *Eur J Intern Med*. 2012; 23:65-9. doi: 10.1016/j.ejim.2011.07.011.
22. Akilzhanova A, Nurkina Z, Momynaliev K, Ramanculov E, Zhumadilov Z, Rakhypbekov T, Hayashida N, Nakashima M, Takamura N. Genetic profile and determinants of homocysteine levels in Kazakhstan patients with breast cancer. *Anticancer Res*. 2013; 33:4049-59.
23. da Cunha PA, de Carlos Back LK, Sereia AF, Kubelka C, Ribeiro MC, Fernandes BL, de Souza IR. Interaction between obesity-related genes, FTO and MC4R, associated to an increase of breast cancer risk. *Mol Biol Rep*. 2013; 40:6657-64. doi: 10.1007/s11033-013-2780-3.
24. Garcia-Closas M, Couch FJ, Lindstrom S, Michailidou K, Schmidt MK, Brook MN, Orr N, Rhie SK, Riboli E, Feigelson HS, Le Marchand L, Buring JE, Eccles D, et al. Genome-wide association studies identify four ER negative-specific breast cancer risk loci. *Nat Genet*. 2013; 45:392-8, 8e1-2. doi: 10.1038/ng.2561.
25. Iles MM, Law MH, Stacey SN, Han J, Fang S, Pfeiffer R, Harland M, Macgregor S, Taylor JC, Aben KK, Akslen LA,

- Avril MF, Azizi E, et al. A variant in FTO shows association with melanoma risk not due to BMI. *Nat Genet.* 2013; 45:428-32, 32e1. doi: 10.1038/ng.2571.
26. Lin Y, Ueda J, Yagyu K, Ishii H, Ueno M, Egawa N, Nakao H, Mori M, Matsuo K, Kikuchi S. Association between variations in the fat mass and obesity-associated gene and pancreatic cancer risk: a case-control study in Japan. *BMC Cancer.* 2013; 13:337. doi: 10.1186/1471-2407-13-337.
  27. Long J, Zhang B, Signorello LB, Cai Q, Deming-Halverson S, Shrubsole MJ, Sanderson M, Dennis J, Michailidou K, Easton DF, Shu XO, Blot WJ, Zheng W. Evaluating genome-wide association study-identified breast cancer risk variants in African-American women. *PLoS One.* 2013; 8:e58350. doi: 10.1371/journal.pone.0058350.
  28. Zheng W, Zhang B, Cai Q, Sung H, Michailidou K, Shi J, Choi JY, Long J, Dennis J, Humphreys MK, Wang Q, Lu W, Gao YT, et al. Common genetic determinants of breast-cancer risk in East Asian women: a collaborative study of 23 637 breast cancer cases and 25 579 controls. *Hum Mol Genet.* 2013; 22:2539-50. doi: 10.1093/hmg/ddt089.
  29. Zhang B, Li Y, Li L, Chen M, Zhang C, Zuo XB, Zhou FS, Liang B, Zhu J, Li P, Huang ZL, Xuan H, Li W, et al. Association study of susceptibility loci with specific breast cancer subtypes in Chinese women. *Breast Cancer Res Treat.* 2014; 146:503-14. doi: 10.1007/s10549-014-3041-4.
  30. Mojaver M, Mokarian F, Kazemi M, Salehi M. Specific TaqMan allelic discrimination assay for rs1477196 and rs9939609 single nucleotide polymorphisms of FTO gene demonstrated that there is no association between these SNPs and risk of breast cancer in Iranian women. *Adv Biomed Res.* 2015; 4:136. doi: 10.4103/2277-9175.161532.
  31. Zeng X, Ban Z, Cao J, Zhang W, Chu T, Lei D, Du Y. Association of FTO Mutations with Risk and Survival of Breast Cancer in a Chinese Population. *Dis Markers.* 2015; 2015:101032. doi: 10.1155/2015/101032.
  32. Zhao Z, Wen W, Michailidou K, Bolla MK, Wang Q, Zhang B, Long J, Shu XO, Schmidt MK, Milne RL, Garcia-Closas M, Chang-Claude J, Lindstrom S, et al. Association of genetic susceptibility variants for type 2 diabetes with breast cancer risk in women of European ancestry. *Cancer Causes Control.* 2016; 27:679-93. doi: 10.1007/s10552-016-0741-6.
  33. Li G, Chen Q, Wang L, Ke D, Yuan Z. Association between FTO gene polymorphism and cancer risk: evidence from 16,277 cases and 31,153 controls. *Tumour Biol.* 2012; 33:1237-43. doi: 10.1007/s13277-012-0372-9.
  34. Zhao J, Huang X, Yang M, Li M, Zheng J. Association between the FTO rs8050136 polymorphism and cancer risk: a meta-analysis. *Fam Cancer.* 2016; 15:145-53. doi: 10.1007/s10689-015-9843-7.
  35. Huang X, Zhao J, Yang M, Li M, Zheng J. Association between FTO gene polymorphism (rs9939609 T/A) and cancer risk: a meta-analysis. *Eur J Cancer Care (Engl).* 2016; doi: 10.1111/ecc.12464.
  36. Xi B, Takeuchi F, Meirhaeghe A, Kato N, Chambers JC, Morris AP, Cho YS, Zhang W, Mohlke KL, Kooner JS, Shu XO, Pan H, Tai ES, et al. Associations of genetic variants in/near body mass index-associated genes with type 2 diabetes: a systematic meta-analysis. *Clin Endocrinol (Oxf).* 2014; 81:702-10. doi: 10.1111/cen.12428.
  37. He D, Fu MS, Miao S, Hotta K, Chandak GR, Xi B. FTO gene variant and risk of hypertension: A meta-analysis of 57,464 hypertensive cases and 41,256 controls. *Metabolism.* 2014; 63:633-9. doi: 10.1016/j.metabol.2014.02.008.
  38. Liu C, Mou S, Pan C. The FTO gene rs9939609 polymorphism predicts risk of cardiovascular disease: a systematic review and meta-analysis. *PLoS One.* 2013; 8:e71901. doi: 10.1371/journal.pone.0071901.
  39. Cai X, Liu C, Mou S. Association between fat mass and obesity-associated (FTO) gene polymorphism and polycystic ovary syndrome: a meta-analysis. *PLoS One.* 2014; 9:e86972. doi: 10.1371/journal.pone.0086972.
  40. Zimmermann E, Angquist LH, Mirza SS, Zhao JH, Chasman DI, Fischer K, Qi Q, Smith AV, Thinggaard M, Jarczok MN, Nalls MA, Trompet S, Timpson NJ, et al. Is the adiposity-associated FTO gene variant related to all-cause mortality independent of adiposity? Meta-analysis of data from 169,551 Caucasian adults. *Obes Rev.* 2015; 16:327-40. doi: 10.1111/obr.12263.
  41. Renehan AG, Tyson M, Egger M, Heller RF, Zwahlen M. Body-mass index and incidence of cancer: a systematic review and meta-analysis of prospective observational studies. *Lancet.* 2008; 371:569-78. doi: 10.1016/S0140-6736(08)60269-X.
  42. Hernandez-Caballero ME, Sierra-Ramirez JA. Single nucleotide polymorphisms of the FTO gene and cancer risk: an overview. *Mol Biol Rep.* 2015; 42:699-704. doi: 10.1007/s11033-014-3817-y.
  43. Stratigopoulos G, Padilla SL, LeDuc CA, Watson E, Hattersley AT, McCarthy MI, Zeltser LM, Chung WK, Leibel RL. Regulation of Fto/Ftm gene expression in mice and humans. *Am J Physiol Regul Integr Comp Physiol.* 2008; 294:R1185-96. doi: 10.1152/ajpregu.00839.2007.
  44. Berulava T, Horsthemke B. Comment on: Jowett et al. (2010) Genetic variation at the FTO locus influences RBL2 gene expression. *Diabetes.* 2010; 59:e9; author reply e10. doi: 10.2337/db10-0337.
  45. DerSimonian R, Laird N. Meta-analysis in clinical trials. *Control Clin Trials.* 1986; 7:177-88.
  46. Mantel N, Haenszel W. Statistical aspects of the analysis of data from retrospective studies of disease. *J Natl Cancer Inst.* 1959; 22:719-48.
  47. Begg CB, Mazumdar M. Operating characteristics of a rank correlation test for publication bias. *Biometrics.* 1994; 50:1088-101.
